# Supplementary material for: Circulation timescales of Atlantic Waters in the Arctic Ocean determined from anthropogenic radionuclides
Source: Copernicus journal article supplement (doi:10.5194/os-2020-82), 2020-08-25
Supplement: Supplementary file 1 [file os-2020-82-supplement.zip]

Archive with 3 entries (3 files):
- supplement_figures.pdf
- Table_S1.xlsx
- Table_S2.xlsx
