# Supplementary material for: Circulation timescales of Atlantic Waters in the Arctic Ocean determined from anthropogenic radionuclides
Source: Copernicus journal article supplement (doi:10.5194/os-2020-82), 2020-08-25
Supplement: Supplementary file 1 [file os-2020-82-supplement.zip › Table_S2.xlsx]

## Sheet: Table_S2
Supplementary Material
Table S2: I-129 and U-239 input functions for the surface and Atlantic layer from 1901 to 2019
	Surface Layer						Atlantic Layer
	Year	I-129	unc I-129	U-236	unc U-236		Year	I-129	unc I-129	U-236	unc U-236
		at/kg	at/kg	at/kg	at/kg			1E6 at/kg	1E6 at/kg	1E6 at/kg	1E6 at/kg
	1901	0	0	0	0		1901	0	0	0	0
	1902	0	0	0	0		1902	0	0	0	0
	1903	0	0	0	0		1903	0	0	0	0
	1904	0	0	0	0		1904	0	0	0	0
	1905	0	0	0	0		1905	0	0	0	0
	1906	0	0	0	0		1906	0	0	0	0
	1907	0	0	0	0		1907	0	0	0	0
	1908	0	0	0	0		1908	0	0	0	0
	1909	0	0	0	0		1909	0	0	0	0
	1910	0	0	0	0		1910	0	0	0	0
	1911	0	0	0	0		1911	0	0	0	0
	1912	0	0	0	0		1912	0	0	0	0
	1913	0	0	0	0		1913	0	0	0	0
	1914	0	0	0	0		1914	0	0	0	0
	1915	0	0	0	0		1915	0	0	0	0
	1916	0	0	0	0		1916	0	0	0	0
	1917	0	0	0	0		1917	0	0	0	0
	1918	0	0	0	0		1918	0	0	0	0
	1919	0	0	0	0		1919	0	0	0	0
	1920	0	0	0	0		1920	0	0	0	0
	1921	0	0	0	0		1921	0	0	0	0
	1922	0	0	0	0		1922	0	0	0	0
	1923	0	0	0	0		1923	0	0	0	0
	1924	0	0	0	0		1924	0	0	0	0
	1925	0	0	0	0		1925	0	0	0	0
	1926	0	0	0	0		1926	0	0	0	0
	1927	0	0	0	0		1927	0	0	0	0
	1928	0	0	0	0		1928	0	0	0	0
	1929	0	0	0	0		1929	0	0	0	0
	1930	0	0	0	0		1930	0	0	0	0
	1931	0	0	0	0		1931	0	0	0	0
	1932	0	0	0	0		1932	0	0	0	0
	1933	0	0	0	0		1933	0	0	0	0
	1934	0	0	0	0		1934	0	0	0	0
	1935	0	0	0	0		1935	0	0	0	0
	1936	0	0	0	0		1936	0	0	0	0
	1937	0	0	0	0		1937	0	0	0	0
	1938	0	0	0	0		1938	0	0	0	0
	1939	0	0	0	0		1939	0	0	0	0
	1940	0	0	0	0		1940	0	0	0	0
	1941	0	0	0	0		1941	0	0	0	0
	1942	0	0	0	0		1942	0	0	0	0
	1943	0	0	0	0		1943	0	0	0	0
	1944	0	0	0	0		1944	0	0	0	0
	1945	0	0	0	0		1945	0	0	0	0
	1946	0	0	0	0		1946	0	0	0	0
	1947	0	0	0	0		1947	0	0	0	0
	1948	0	0	0	0		1948	0	0	0	0
	1949	0	0	0	0		1949	0	0	0	0
	1950	10000000	0	120.589	0		1950	10000000	0	120.589	0
	1951	10000000	0	121.318	0		1951	10000000	0	121.318	0
	1952	10000000	0	3617.18	0		1952	10000000	0	3617.18	0
	1953	10000000	0	11047.7	0		1953	10000000	0	11047.7	0
	1954	10000000	0	182529	0		1954	10000000	0	182529	0
	1955	10000000	0	657729	0		1955	10000000	0	657729	0
	1956	10000000	0	1.84501e+06	0		1956	10000000	0	1.84501e+06	0
	1957	10000000	0	3.10647e+06	0		1957	10000000	0	3.10647e+06	0
	1958	10000000	0	4.74706e+06	0		1958	10000000	0	4.74706e+06	0
	1959	10000000	0	7.82495e+06	0		1959	10000000	0	7.82495e+06	0
	1960	10000000	0	1.08121e+07	0		1960	10000000	0	1.08121e+07	0
	1961	10000000	0	1.16505e+07	0		1961	10000000	0	1.16505e+07	0
	1962	10000000	0	1.33473e+07	0		1962	10000000	0	1.33473e+07	0
	1963	10000000	0	1.8759e+07	0		1963	10000000	0	1.8759e+07	0
	1964	10000000	0	2.86641e+07	0		1964	10000000	0	2.86641e+07	0
	1965	10000000	0	3.30263e+07	0		1965	10000000	0	3.30263e+07	0
	1966	10000000	0	3.4391e+07	0		1966	10000000	0	3.4391e+07	0
	1967	10000000	0	3.42947e+07	0		1967	10000000	0	3.42947e+07	0
	1968	10000000	0	3.36057e+07	0		1968	10000000	0	3.36057e+07	0
	1969	10000000	0	3.25664e+07	0		1969	10000000	0	3.25664e+07	0
	1970	10000000	0	3.16218e+07	0		1970	10000000	0	3.16218e+07	0
	1971	1.32157e+08	1.53647e+07	4.17855e+07	2.26595e+06		1971	3.43418e+07	2.13981e+06	3.30157e+07	276009
	1972	1.64791e+08	1.9138e+07	4.07973e+07	2.24127e+06		1972	4.04192e+07	2.77317e+06	3.20829e+07	274271
	1973	2.91574e+08	3.43824e+07	3.96919e+07	2.25918e+06		1973	6.29179e+07	5.53748e+06	3.08133e+07	276358
	1974	3.7331e+08	4.41844e+07	4.92254e+07	4.26227e+06		1974	7.92341e+07	6.91937e+06	3.21742e+07	459943
	1975	4.49972e+08	5.36241e+07	5.45413e+07	5.54425e+06		1975	9.50712e+07	8.11865e+06	3.25874e+07	584657
	1976	5.56946e+08	7.16046e+07	6.12081e+07	7.15171e+06		1976	1.21999e+08	9.22254e+06	3.31973e+07	743947
	1977	6.14757e+08	8.66153e+07	5.67402e+07	6.45947e+06		1977	1.38523e+08	1.00758e+07	3.11264e+07	676161
	1978	6.7359e+08	9.50117e+07	5.12686e+07	5.38932e+06		1978	1.51017e+08	1.10545e+07	2.91898e+07	566468
	1979	6.34006e+08	9.46316e+07	4.55252e+07	4.35553e+06		1979	1.45274e+08	1.05291e+07	2.69852e+07	465190
	1980	8.14734e+08	1.20213e+08	4.2642e+07	3.93251e+06		1980	1.83588e+08	1.35143e+07	2.54298e+07	426646
	1981	9.80527e+08	1.58341e+08	4.62778e+07	4.8891e+06		1981	2.25449e+08	1.69103e+07	2.54743e+07	527254
	1982	1.15176e+09	1.94433e+08	4.96697e+07	6.25018e+06		1982	2.66871e+08	2.04135e+07	2.55407e+07	695802
	1983	1.26357e+09	2.22563e+08	5.25794e+07	6.97654e+06		1983	2.95658e+08	2.30764e+07	2.54431e+07	773171
	1984	1.47257e+09	2.62392e+08	5.36651e+07	7.3622e+06		1984	3.44353e+08	2.71359e+07	2.4929e+07	820848
	1985	1.84349e+09	3.24771e+08	6.30397e+07	9.29347e+06		1985	4.27537e+08	3.36922e+07	2.64369e+07	1.0148e+06
	1986	2.14586e+09	3.90877e+08	8.52457e+07	1.37834e+07		1986	5.01253e+08	4.02484e+07	3.10571e+07	1.45947e+06
	1987	2.89689e+09	5.40718e+08	9.37655e+07	1.55132e+07		1987	6.78699e+08	5.54471e+07	3.2313e+07	1.65688e+06
	1988	3.11049e+09	5.98265e+08	9.79528e+07	1.64264e+07		1988	7.34684e+08	6.11024e+07	3.26268e+07	1.76465e+06
	1989	3.66359e+09	7.15034e+08	1.06185e+08	1.81083e+07		1989	8.67642e+08	7.29228e+07	3.3866e+07	1.96145e+06
	1990	3.22042e+09	6.3279e+08	9.59567e+07	1.5279e+07		1990	7.65236e+08	6.44952e+07	3.08127e+07	1.65084e+06
	1991	3.33654e+09	6.57325e+08	9.71868e+07	1.51405e+07		1991	7.93151e+08	6.69823e+07	3.05662e+07	1.61413e+06
	1992	3.37962e+09	6.62158e+08	6.45302e+07	8.91598e+06		1992	8.0196e+08	6.75057e+07	2.23897e+07	1.00136e+06
	1993	4.41573e+09	8.73931e+08	6.3458e+07	8.84907e+06		1993	1.04845e+09	8.90281e+07	2.17525e+07	981828
	1994	5.28005e+09	1.05516e+09	4.39468e+07	5.50618e+06		1994	1.2557e+09	1.07422e+08	1.71379e+07	681010
	1995	6.56215e+09	1.32187e+09	4.33575e+07	5.31272e+06		1995	1.56236e+09	1.34516e+08	1.69852e+07	661414
	1996	9.12513e+09	1.87838e+09	5.0509e+07	6.81242e+06		1996	2.18361e+09	1.90985e+08	1.88539e+07	769667
	1997	1.32975e+10	2.75357e+09	5.17866e+07	7.31373e+06		1997	3.18401e+09	2.79933e+08	1.9195e+07	824698
	1998	1.7435e+10	3.62873e+09	5.81475e+07	7.76498e+06		1998	4.17859e+09	3.68868e+08	2.04674e+07	876158
	1999	1.95466e+10	4.049e+09	5.52048e+07	6.72384e+06		1999	4.67691e+09	4.11627e+08	1.93171e+07	863997
	2000	2.07723e+10	4.27173e+09	6.08084e+07	7.37817e+06		2000	4.95868e+09	4.3435e+08	2.02319e+07	1.00334e+06
	2001	2.15772e+10	4.38959e+09	5.75139e+07	7.14817e+06		2001	5.13359e+09	4.46506e+08	1.95132e+07	985070
	2002	2.0904e+10	4.20348e+09	5.17077e+07	6.7506e+06		2002	4.95616e+09	4.27817e+08	1.84138e+07	915323
	2003	1.86222e+10	3.7104e+09	4.34771e+07	5.79066e+06		2003	4.40378e+09	3.77845e+08	1.67052e+07	793336
	2004	1.64798e+10	3.26482e+09	3.60503e+07	4.67035e+06		2004	3.89135e+09	3.32603e+08	1.49202e+07	692911
	2005	1.61402e+10	3.18224e+09	3.22783e+07	4.01721e+06		2005	3.8058e+09	3.24311e+08	1.40581e+07	620062
	2006	1.69808e+10	3.32499e+09	3.1354e+07	5.03534e+06		2006	3.99524e+09	3.39059e+08	1.38758e+07	738887
	2007	1.74325e+10	3.40843e+09	3.23031e+07	4.98225e+06		2007	4.09948e+09	3.47615e+08	1.41706e+07	719991
	2008	1.75302e+10	3.42607e+09	3.32244e+07	4.51434e+06		2008	4.12187e+09	3.49429e+08	1.43596e+07	665192
	2009	1.72281e+10	3.42375e+09	3.20338e+07	3.62063e+06		2009	4.07152e+09	3.48715e+08	1.41418e+07	548382
	2010	1.55573e+10	3.12175e+09	2.85747e+07	3.32379e+06		2010	3.68826e+09	3.17757e+08	1.34022e+07	510685
	2011	1.41854e+10	2.91071e+09	2.58726e+07	3.30751e+06		2011	3.38662e+09	2.95979e+08	1.28992e+07	494090
	2012	1.41161e+10	2.91051e+09	2.44196e+07	2.93877e+06		2012	3.37508e+09	2.95917e+08	1.26628e+07	436252
	2013	1.49843e+10	3.08609e+09	2.40004e+07	2.53548e+06		2013	3.58094e+09	3.13779e+08	1.26156e+07	379685
	2014	1.59329e+10	3.26194e+09	2.35124e+07	2.42895e+06		2014	3.8002e+09	3.3172e+08	1.25364e+07	362075
	2015	1.6811e+10	3.41846e+09	2.31289e+07	2.66013e+06		2015	4.00094e+09	3.47728e+08	1.24353e+07	393468
	2016	1.7881e+10	3.65038e+09	2.24296e+07	2.40848e+06		2016	4.26015e+09	3.71261e+08	1.22921e+07	361255
	2017	1.93176e+10	3.95141e+09	2.32382e+07	2.37292e+06		2017	4.6045e+09	4.01849e+08	1.24336e+07	362630
	2018	1.87475e+10	3.83725e+09	2.36566e+07	3.18625e+06		2018	4.46972e+09	3.9023e+08	1.24982e+07	465439
	2019	1.88653e+10	3.84023e+09	2.33116e+07	3.06591e+06		2019	4.49026e+09	3.90615e+08	1.24488e+07	446797
