# Supplementary material for: Circulation timescales of Atlantic Waters in the Arctic Ocean determined from anthropogenic radionuclides
Source: Copernicus journal article supplement (doi:10.5194/os-2020-82), 2020-08-25
Supplement: Supplementary file 1 [file Table_S1.xlsx]

## Sheet: Table_S1
Supplementary Material
Table S1: Metadata and radionuclide concentrations for all samples used in this study
PML = Polar Mixed Layer (Arctic Ocean), PSW = Polar Surface Water (Fram Strait), AAW = Arctic Atlantic Water, AIW = Arctic Intermediate Water, FSBW = Fram Strait Branch Water
NB = Nansen Basin, AB = Amundsen Basin, MB = Makarov Basin, LS = Laptev Sea, CB = Canada basin, FS = Fram Strait
	Cruise	Year	Station	Latitude	Longitude	Depth	Sal	ϴ	σϴ	I129 conc.	unc. I129 conc.	U236 conc.	unc U236 conc.	U236/U238	unc. U236/U238	Water mass	Location/Basin	Tracer age	Dilution factor	Mean age Γ	Δ	Δ/Γ	Mode age tmax	Reference
				°N	°E	m		°C	kg/m^3	at/kg	at/kg	at/kg	at/kg					years		years	years		years
	PS78 (ARK XXVI/3)	2011	201	85.509	59.8848	10	33.27	-1.7172	26.7767	2.44555e+09	2.70728e+07	1.5182e+07	1.58408e+06	1.99572e-09	1.88818e-10	PML	NB	10	6.66667	n/a	n/a	n/a	n/a	Casacuberta et al. (2016)
			204	86.2387	59.3258	250	34.8745	1.6779	27.8963	1.91045e+09	3.56624e+07	1.95659e+07	1.15471e+06	2.40132e-09	1.12981e-10	AAW	NB	n/a	n/a	29	20	0.689655	9.15036
			204	86.2387	59.3258	800	34.884	-0.045	28.0151	1.84158e+09	3.49911e+07	1.97308e+07	1.14639e+06	2.33608e-09	1.04723e-10	AIW	NB	n/a	n/a	29	20	0.689655	9.15036
			205	86.3325	59.2523	10	33.2835	-1.7104	26.7832	4.96258e+09	5.43779e+07	2.04591e+07	2.85075e+06	2.55214e-09	3.26391e-10	PML	NB	10	4	n/a	n/a	n/a	n/a
			209	86.987	58.503	10	32.8566	-1.7192	26.4364	3.56567e+09	3.91776e+07	2.97834e+07	2.29609e+06	3.72445e-09	2.77414e-10	PML	AB	16	1.66667	n/a	n/a	n/a	n/a
			212	88.0183	59.9525	10	32.8042	-1.688	26.3931	6.21578e+09	6.79291e+07	2.97916e+07	2.36894e+06	3.35739e-09	2.63091e-10	PML	AB	14	2.22222	n/a	n/a	n/a	n/a
			218	89.8943	55.0322	250	34.8305	1.1233	27.9009	2.30786e+09	4.33513e+07	1.79407e+07	854276	2.12733e-09	6.39397e-11	AAW	AB	n/a	n/a	28	26	0.928571	5.22385
			218	89.8943	55.0322	750	34.89	0.0535	28.0146	2.58908e+09	4.8385e+07	2.01356e+07	838892	2.21976e-09	5.81716e-11	AAW	AB	n/a	n/a	19	12	0.631579	6.89362
			226	87.2843	-165.306	300	34.8428	0.9173	27.9246	1.63407e+09	3.1179e+07	2.29164e+07	1.82169e+06	2.76602e-09	1.66959e-10	AAW	MB	n/a	n/a	25	11	0.44	14.3907
			226	87.2843	-165.306	800	34.8694	-0.0462	28.0033	1.27064e+09	2.49974e+07	1.977e+07	1.29768e+06	2.23866e-09	1.01098e-10	AIW	MB	n/a	n/a	36	22	0.611111	13.7294
			235	83.026	-130.008	9.9	29.0035	-1.4884	23.3036	1.05799e+08	4.30971e+06	8.2e+06	800000	1.205e-09	1.05e-10	PML	CB	n/a	n/a	n/a	n/a	n/a	n/a
			235	83.026	-130.008	800	34.8764	0.102	28.001	2.52295e+08	1.27352e+07	1.85175e+07	899250	2.05194e-09	7.02906e-11	AAW	CB	n/a	n/a	48	18	0.375	31.8467
			239	84.0735	-164.202	10	28.6701	-1.4966	23.0332	2.74515e+09	3.03894e+07	1.93731e+07	955893	2.69702e-09	1.21094e-10	PML	CB	14	5	n/a	n/a	n/a	n/a
			245	84.7945	166.415	10	29.4505	-1.5748	23.6675	5.4399e+09	5.96907e+07	2.79561e+07	1.98286e+06	3.84374e-09	2.61868e-10	PML	MB	14	2.22222	n/a	n/a	n/a	n/a
			248	84.688	150.107	10	28.3697	-1.537	22.79	6.18989e+09	6.65705e+07	2.88658e+07	2.1194e+06	3.82764e-09	2.57787e-10	PML	MB	14	2.5	n/a	n/a	n/a	n/a
			250	84.385	139.91	10	29.7431	-1.6026	23.9053	5.16788e+09	5.62587e+07	2.63442e+07	1.91658e+06	3.48761e-09	2.4099e-10	PML	AB	14	2.5	n/a	n/a	n/a	n/a
			254	83.3287	125.089	263	34.8749	1.3635	27.9198	2.13043e+09	4.02696e+07	1.86937e+07	1.11218e+06	2.12893e-09	9.68275e-11	AAW	AB	n/a	n/a	28	23	0.821429	6.53899
			254	83.3287	125.089	800	34.8919	-0.0492	28.0217	2.46334e+09	4.60991e+07	17480000	489440	2.073e-09	4.146e-11	AIW	AB	n/a	n/a	27	28	1.03704	4.08837
			257	83.3362	124.905	10	30.4743	-1.6528	24.4998	6.27929e+09	6.76912e+07	2.20954e+07	1.70622e+06	2.96522e-09	2.17833e-10	PML	AB	9	3.33333	n/a	n/a	n/a	n/a
			259	83.1502	117.946	10	30.9527	-1.6947	24.889	5.65087e+09	6.13453e+07	2.56383e+07	3.11025e+06	3.45976e-09	3.98557e-10	PML	AB	13	2.85714	n/a	n/a	n/a	n/a
			272	81.774	119.973	10	31.589	-1.639	25.4048	4.61995e+09	5.05937e+07	2.11689e+07	1.6413e+06	2.83617e-09	2.07982e-10	PML	AB - close to LS	11	4	n/a	n/a	n/a	n/a
			276	80.6437	121.328	10	30.8329	-0.0885	24.7469	5.45116e+09	5.95451e+07	2.68149e+07	2.16049e+06	2.65804e-09	1.89763e-10	PML	AB - close to LS	14	2.5	n/a	n/a	n/a	n/a
			280	79.1473	124.126	10	30.5447	0.8667	24.4712	5.6368e+09	6.09237e+07	2.32601e+07	1.85456e+06	3.2245e-09	2.44867e-10	PML (warm)	AB - close to LS	12	3.33333	n/a	n/a	n/a	n/a
			285	78.4932	125.802	10	30.5535	1.5824	24.4377	7.11799e+09	7.6525e+07	2.54164e+07	3.15068e+06	3.53981e-09	4.18608e-10	PML (warm)	AB - close to LS	10	2.85714	n/a	n/a	n/a	n/a
	PS80 (ARK XXVII/3)	2012	224	84.0243	31.2274	25	33.9766	-1.5223	27.3413	3.00861e+09	4.88657e+07	1.72713e+07	898518	2.17435e-09	7.35522e-11	PML	NB	12	6.66667	n/a	n/a	n/a	n/a	Casacuberta et al. (2016)
			224	84.0243	31.2274	250	34.9354	2.1443	27.9083	1.60907e+09	2.64545e+07	1.71864e+07	816055	2.09542e-09	7.26825e-11	AAW	NB	n/a	n/a	44	38	0.863636	9.38468
			224	84.0243	31.2274	500	34.9265	1.2235	27.9712	1.33171e+09	2.13186e+07	2.03412e+07	708652	2.45701e-09	5.83818e-11	AAW	NB	n/a	n/a	34	19	0.558824	14.7369
			295	78.7333	132.317	25	31.637	-1.1824	25.4332	8.04467e+09	9.80488e+07	2.73854e+07	890379	3.66988e-09	8.06543e-11	PML	AB - close to LS	11	2.5	n/a	n/a	n/a	n/a
			295	78.7333	132.317	250	34.8741	1.2916	27.9243	2.42321e+09	2.8014e+07	1.51204e+07	694098	1.8792e-09	6.19386e-11	AAW	AB - close to LS	n/a	n/a	50	90	1.8	2.56525
			295	78.7333	132.317	500	34.8854	0.3306	27.9953	2.46523e+09	2.8014e+07	1.62109e+07	622005	1.99033e-09	5.28566e-11	AAW	AB - close to LS	n/a	n/a	34	44	1.29412	3.35075
			295	78.7333	132.317	800	34.8809	-0.3591	28.0289	2.96481e+09	3.73519e+07	1.74747e+07	734344	2.07857e-09	5.84601e-11	AIW	AB - close to LS	n/a	n/a	17	16	0.941176	3.09271
			378	86.8833	52	25	33.1487	-1.8063	26.6758	5.59812e+09	6.53659e+07	2.5227e+07	766289	3.17419e-09	6.34839e-11	PML	AB	14	2.85714	n/a	n/a	n/a	n/a
			378	86.8833	52	260	34.8655	1.3926	27.91	1.97031e+09	2.3345e+07	1.91003e+07	587198	2.3003e-09	4.71652e-11	AAW	AB	n/a	n/a	30	21	0.7	9.23676
			378	86.8833	52	700	34.8771	0.128	28.0001	2.23178e+09	2.8014e+07	2.00785e+07	629417	2.4407e-09	5.8132e-11	AAW	AB	n/a	n/a	24	15	0.625	8.84817
	ACCACIA	2013	18	82.6635	26.0874	250	34.926	2.067	27.907	1.72875e+09	4.24231e+07	1.62271e+07	493687	1.80322e-09	6.51625e-11	AAW	NB	n/a	n/a	49	50	1.02041	7.65199	this study
			18	82.6635	26.0874	500	34.961	1.61	27.971	1.44348e+09	3.44858e+07	1.65359e+07	553612	1.85586e-09	7.22861e-11	AAW	NB	n/a	n/a	50	44	0.88	10.304
	PS94 (ARK XXIX/3)	2015	40	82.7088	30.7835	9.6	33.6344	-1.5199	27.0632	3.50697e+09	4.33231e+07	1.34398e+07	745281	1.60366e-09	9.46975e-11	PML	NB	3	4	n/a	n/a	n/a	n/a	Casacuberta et al. (2018)
			40	82.7088	30.7835	300.1	34.9758	2.2569	27.9313	3.59065e+09	4.51492e+07	1.84462e+07	1.80629e+06	2.10252e-09	2.0856e-10	AAW	NB	n/a	n/a	13	4	0.307692	9.82188
			40	82.7065	30.9177	500.9	34.9544	1.5237	27.9719	2.17133e+09	2.71553e+07	1.75168e+07	648249	1.99061e-09	8.34576e-11	AAW	NB	n/a	n/a	33	27	0.818182	7.76155
			50	84.3867	29.9305	10.3	33.3683	-1.5357	26.8476	3.78888e+09	4.63528e+07	1.49919e+07	660205	1.77166e-09	8.59493e-11	PML	NB	7	4	n/a	n/a	n/a	n/a
			50	84.3882	30.4142	299.9	34.9328	1.8895	27.9267	2.16603e+09	2.78409e+07	1.60258e+07	571593	1.82841e-09	7.08068e-11	AAW	NB	n/a	n/a	40	43	1.075	5.65364
			50	84.3882	30.4142	500.5	34.9299	1.233	27.9732	1.84896e+09	2.38474e+07	1.8088e+07	523999	2.03767e-09	6.74566e-11	AAW	NB	n/a	n/a	36	26	0.722222	10.5206
			58	85.3013	59.9422	9.9	33.2594	-1.7667	26.7649	3.0411e+09	3.97626e+07	1.44865e+07	711898	1.79511e-09	9.34959e-11	PML	NB	10	5	n/a	n/a	n/a	n/a
			58	85.2968	59.9347	300.1	34.9542	1.9167	27.9417	2.34597e+09	2.92533e+07	1.57824e+07	749016	1.8415e-09	9.43186e-11	AAW	NB	n/a	n/a	37	43	1.16216	4.49832
			58	85.2968	59.9347	500.4	34.9176	1.0203	27.9779	2.25704e+09	2.89723e+07	1.77391e+07	543379	2.06122e-09	7.09892e-11	AAW	NB	n/a	n/a	30	24	0.8	7.34428
			68	86.9748	58.8395	10.2	33.1162	-1.646	26.6456	8.58987e+09	1.04682e+08	2.27383e+07	722562	2.82345e-09	1.04015e-10	PML	AB	11	2	n/a	n/a	n/a	n/a
			68	86.9862	58.8168	300.1	34.8734	1.1855	27.9311	2.57378e+09	3.22921e+07	1.88911e+07	582398	2.21555e-09	7.77125e-11	AAW	AB	n/a	n/a	23	14	0.608696	8.82345
			68	86.9862	58.8168	500.9	34.8859	0.5885	27.9803	2.58793e+09	3.27776e+07	1.91356e+07	581013	2.28223e-09	7.85656e-11	AAW	AB	n/a	n/a	22	13	0.590909	8.81507
			81	89.005	61.3192	10.3	30.2583	-1.4553	24.3211	7.09352e+09	8.45829e+07	2.12666e+07	1.0371e+06	2.81667e-09	1.4371e-10	PML	AB	11	2.5	n/a	n/a	n/a	n/a
			81	88.9988	61.2793	300.6	34.8704	1.1686	27.9299	2.80808e+09	3.50812e+07	1.72408e+07	725237	2.01823e-09	9.01336e-11	AAW	AB	n/a	n/a	21	17	0.809524	5.03394
			81	88.9988	61.2793	500.8	34.8868	0.6311	27.9784	2.72995e+09	3.41813e+07	1.74729e+07	718003	2.0625e-09	9.02233e-11	AAW	AB	n/a	n/a	22	17	0.772727	5.72489
			101	87.4992	-179.947	18.2	28.1318	-1.5022	22.5966	1.48545e+09	1.86515e+07	1.13471e+07	556183	1.68393e-09	8.63172e-11	PML	MB	2	10	n/a	n/a	n/a	n/a
			101	87.5022	179.833	300	34.8468	0.8748	27.9306	2.53534e+09	3.34405e+07	2.10639e+07	697016	2.58978e-09	9.40908e-11	AAW	MB	n/a	n/a	21	9	0.428571	12.4056
			101	87.5052	179.846	499.3	34.8693	0.552	27.9691	2.08687e+09	2.60002e+07	2.19734e+07	699450	2.61017e-09	9.1849e-11	AAW	MB	n/a	n/a	25	10	0.4	15.7308
			101	87.5052	179.846	799	34.8781	-0.0401	28.01	1.57693e+09	2.10704e+07	2.35201e+07	754247	2.81166e-09	9.9541e-11	AIW	MB	n/a	n/a	28	9	0.321429	20.6355
			117	84.5068	115.679	9.9	32.1289	-1.7283	25.8452	8.05666e+09	9.593e+07	2.10908e+07	781893	2.60936e-09	1.04354e-10	PML	AB	10	2	n/a	n/a	n/a	n/a
			117	84.529	115.887	300.1	34.8713	1.1862	27.9294	2.83793e+09	3.55243e+07	1.7989e+07	623895	2.08892e-09	7.89336e-11	AAW	AB	n/a	n/a	20	14	0.7	6.15784
			117	84.529	115.887	501.4	34.8853	0.5662	27.9812	2.68171e+09	3.39794e+07	1.93488e+07	724234	2.22779e-09	8.98337e-11	AAW	AB	n/a	n/a	21	12	0.571429	8.82557
			125	85.0978	139.627	9.9	29.9039	-1.6163	24.0361	6.63698e+09	7.93675e+07	1.94351e+07	926770	2.54399e-09	1.27171e-10	PML	AB	10	2.22222	n/a	n/a	n/a	n/a
			125	85.0822	139.773	300.2	34.8841	1.0846	27.9467	2.97906e+09	3.78894e+07	1.64174e+07	835510	1.86721e-09	9.90672e-11	AAW	AB	n/a	n/a	18	16	0.888889	3.64148
			125	85.0855	139.979	500.2	34.8869	0.5306	27.9846	3.24245e+09	4.05735e+07	1.60331e+07	993067	1.90729e-09	1.2155e-10	AAW	AB	n/a	n/a	13	11	0.846154	2.87787
			134	84.8443	159.025	31	29.79	n/a	23.945	9.73357e+08	1.22484e+07	1.18209e+07	563011	1.83278e-09	3.03051e-10	PML	MB	12	20	n/a	n/a	n/a	n/a
			134	84.8443	159.025	300.3	34.8552	1.0016	27.929	3.12728e+09	3.92499e+07	2.03197e+07	1.08717e+06	2.40211e-09	1.45915e-10	AAW	MB	n/a	n/a	17	3	0.176471	15.4858
			134	84.8443	159.025	500	34.8748	0.5446	27.974	2.66109e+09	3.54124e+07	1.95207e+07	783452	2.38337e-09	1.25525e-10	AAW	MB	n/a	n/a	21	12	0.571429	8.82557
	HLY1502	2015	56	75.0474	-150.371	10	25.4372	-1.01239	20.4092	134000000	2450000	1.12479e+07	546283	1.88357e-09	1.04696e-09	PML	CB	20	20	n/a	n/a	n/a	n/a	this study
			56	75.0474	-150.371	301.3	34.4187	-0.284921	27.6513	1340000000	21300000	4.47364e+07	1.21239e+06	5.61388e-09	2.66632e-09	AAW	CB	n/a	n/a	n/a	n/a	n/a	n/a
			56	75.0474	-150.371	399.5	34.7778	0.596616	27.8927	764000000	12100000	3.60935e+07	989682	4.4853e-09	2.12088e-09	AAW	CB	n/a	n/a	n/a	n/a	n/a	n/a
			56	75.0474	-150.371	502.9	34.8282	0.693061	27.9273	588000000	9320000	2.96073e+07	1.87981e+06	3.67407e-09	1.74888e-09	AAW	CB	n/a	n/a	29	2	0.0689655	28.5892
			56	75.0474	-150.371	599.1	34.8502	0.558809	27.9533	658000000	10400000	3.22538e+07	972656	4.00023e-09	1.89049e-09	AAW	CB	n/a	n/a	n/a	n/a	n/a	n/a
			56	75.0474	-150.371	800	34.8648	0.228956	27.9845	695000000	11000000	2.84107e+07	541318	3.52219e-09	1.66223e-09	AAW	CB	n/a	n/a	27	3	0.111111	26.0185
	PS100 (ARK XXX/2)	2016	15	78.9993	8.328	9.9	34.9652	9.116	27.0722	3.17435e+09	7.67556e+07	1.21549e+07	538613	1.37077e-09	6.4128e-11	FSBW	FS	n/a	n/a	n/a	n/a	n/a	n/a	Wefing et al. (2019)
			15	78.9993	8.328	45	35.1245	6.1599	27.6305	2.80771e+09	6.75894e+07	1.13925e+07	494470	1.2573e-09	5.77377e-11	FSBW	FS	n/a	n/a	n/a	n/a	n/a	n/a
			52	80.7505	0.0865	9.8	32.8554	-1.6373	26.4335	4.40052e+09	1.06499e+08	1.98512e+07	654922	2.4497e-09	8.87805e-11	PSW	FS	15	5	n/a	n/a	n/a	n/a
			52	80.7505	0.0865	499.9	34.9141	1.1425	27.9668	1.76267e+09	4.2701e+07	2.05495e+07	883980	2.36021e-09	1.07525e-10	AAW	FS	n/a	n/a	32	16	0.5	16
			52	80.7505	0.0865	799.8	34.9099	0.2292	28.0209	1.62523e+09	4.0622e+07	1.59276e+07	435645	1.82557e-09	5.78347e-11	AAW	FS	n/a	n/a	52	46	0.884615	10.6136
			56	80.3308	-4.0245	10.3	30.4697	-1.4286	24.4922	6.05826e+09	1.46326e+08	1.96631e+07	479505	2.66737e-09	7.63668e-11	PSW	FS - EGC core	12	2.85714	n/a	n/a	n/a	n/a
			56	80.3308	-4.0245	300.8	34.8325	0.8441	27.9211	2.04515e+09	4.992e+07	2.19737e+07	816257	2.4813e-09	9.9404e-11	AAW	FS - EGC core	n/a	n/a	26	10	0.384615	16.9069
			56	80.3308	-4.0245	470.3	34.8679	0.5191	27.97	1.41487e+09	3.45559e+07	2.00457e+07	439808	2.29509e-09	6.09983e-11	AAW	FS - EGC core	n/a	n/a	37	19	0.513514	17.9076
			56	80.3308	-4.0245	799.8	34.8858	0.0149	28.0133	1.38883e+09	3.45055e+07	1.76272e+07	698551	2.01708e-09	8.54697e-11	AAW	FS - EGC core	n/a	n/a	45	29	0.644444	15.8254
			66	80.2165	-8.1913	9.7	30.46	-1.0532	24.4762	6.05753e+09	1.46245e+08	2.04935e+07	479028	2.73628e-09	7.59964e-11	PSW	FS - EGC core	13	2.85714	n/a	n/a	n/a	n/a
			82	80.4485	-13.1885	10	31.2104	-1.3463	25.0913	4.45302e+09	1.07701e+08	2.06615e+07	1.00105e+06	2.69931e-09	1.36906e-10	PSW	FS	16	4	n/a	n/a	n/a	n/a
			90	78.831	-11.9998	10.2	31.6903	-1.1785	25.4763	4.96443e+09	1.21778e+08	2.18638e+07	930620	2.85229e-09	1.28724e-10	PSW	FS	16	4	n/a	n/a	n/a	n/a
			94	78.678	-7.9433	9.8	31.1491	-1.1735	25.0375	6.28803e+09	1.52072e+08	2.06586e+07	534116	2.69261e-09	8.04839e-11	PSW	FS - EGC core	13	2.85714	n/a	n/a	n/a	n/a
			101	78.7767	-3.5502	301	34.8808	1.238	27.9334	1.9984e+09	4.88005e+07	1.91632e+07	660898	2.204e-09	8.28896e-11	AAW	FS - EGC core	n/a	n/a	32	19	0.59375	12.7331
			101	78.7767	-3.5502	500.1	34.8731	0.413	27.9806	1.58208e+09	3.84383e+07	1.86987e+07	654651	2.20784e-09	8.40932e-11	AAW	FS - EGC core	n/a	n/a	39	23	0.589744	15.6714
			101	78.7767	-3.5502	801.9	34.8885	-0.0376	28.0183	1.26629e+09	3.15142e+07	1.58422e+07	404252	1.82562e-09	5.40379e-11	AIW	FS - EGC core	n/a	n/a	57	44	0.77193	14.8594
			103	78.8027	-2.2197	301.3	34.9479	1.9874	27.931	2.03721e+09	4.95776e+07	1.43067e+07	582303	1.69564e-09	7.35526e-11	AAW	FS	n/a	n/a	65	97	1.49231	4.83763
			103	78.8027	-2.2197	500.4	34.892	0.6475	27.9815	1.77045e+09	4.31116e+07	1.87246e+07	604422	2.18136e-09	7.76445e-11	AAW	FS	n/a	n/a	36	22	0.611111	13.7294
			103	78.8027	-2.2197	801.9	34.9102	-0.0116	28.0344	1.53685e+09	3.82414e+07	1.62215e+07	375124	1.86112e-09	5.12996e-11	AIW	FS	n/a	n/a	51	42	0.823529	11.8559
			135	76.8013	-8.6172	10	30.9094	-0.4416	24.8217	5.61033e+09	1.35471e+08	2.15286e+07	492375	2.81981e-09	7.71242e-11	PSW	FS	14	3.33333	n/a	n/a	n/a	n/a
			135	76.8013	-8.6172	300	34.9452	1.7682	27.946	1.85627e+09	4.49911e+07	1.62011e+07	528017	1.84449e-09	6.61758e-11	AAW	FS	n/a	n/a	46	42	0.913043	8.85568
			135	76.8013	-8.6172	342.9	34.9441	1.4512	27.969	1.74218e+09	4.24532e+07	1.57333e+07	504875	1.84267e-09	6.52718e-11	AAW	FS	n/a	n/a	51	49	0.960784	8.92598
			165	77.8675	-14.7747	10.2	29.5976	-0.1067	23.7509	5.08982e+09	1.22161e+08	1.99016e+07	516464	2.74123e-09	8.21661e-11	PSW	FS	14	4	n/a	n/a	n/a	n/a
			165	77.8675	-14.7747	299.5	34.8574	1.6574	27.8841	2.0965e+09	5.04361e+07	1.61185e+07	408821	1.91762e-09	5.65064e-11	AAW	FS	n/a	n/a	41	40	0.97561	6.97169
			165	77.8675	-14.7747	400.1	34.9387	1.4625	27.9638	1.61005e+09	3.90208e+07	1.67449e+07	462624	1.97467e-09	6.20779e-11	AAW	FS	n/a	n/a	47	36	0.765957	12.4194
			189	79.1988	-17.0917	10	30.9514	-1.2288	24.8786	4.53799e+09	1.09395e+08	1.96727e+07	510034	2.61196e-09	7.82348e-11	PSW	FS	15	4	n/a	n/a	n/a	n/a
			189	79.1988	-17.0917	300.2	34.8356	1.3743	27.8874	1.98309e+09	4.82729e+07	1.89792e+07	1.01612e+06	2.21644e-09	1.23234e-10	AAW	FS	n/a	n/a	32	20	0.625	11.7976
			189	79.1988	-17.0917	378.6	34.9376	1.4856	27.9612	1.65499e+09	4.03973e+07	1.81728e+07	520125	2.05904e-09	6.65348e-11	AAW	FS	n/a	n/a	39	26	0.666667	13
			241	79.5687	-19.518	10.3	29.6482	-0.3693	23.8005	3.98531e+09	9.61624e+07	1.92349e+07	590350	2.53691e-09	8.66632e-11	PSW	FS	17	5	n/a	n/a	n/a	n/a
			241	79.5687	-19.518	350.6	34.6578	0.8243	27.7818	2.07997e+09	5.05106e+07	1.97761e+07	467395	2.27602e-09	6.37115e-11	AAW	FS	n/a	n/a	29	16	0.551724	12.7898
			241	79.5687	-19.518	456.5	34.8038	1.2596	27.87	2.05241e+09	4.99013e+07	1.82017e+07	469289	2.1147e-09	6.30786e-11	AAW	FS	n/a	n/a	33	23	0.69697	10.2335
			280	79.5775	-4.793	9.8	30.1815	-1.553	24.2605	5.94959e+09	1.43715e+08	2.02505e+07	500368	2.76255e-09	7.98529e-11	PSW	FS - EGC core	13	2.85714	n/a	n/a	n/a	n/a
			280	79.5775	-4.793	300.5	34.8536	1.0613	27.9237	2.0196e+09	4.9214e+07	1.94422e+07	892978	2.32459e-09	1.12318e-10	AAW	FS - EGC core	n/a	n/a	31	18	0.580645	12.7374
			280	79.5775	-4.793	500.6	34.8678	0.4936	27.9715	1.45109e+09	3.52572e+07	1.98221e+07	776425	2.30502e-09	9.66805e-11	AAW	FS - EGC core	n/a	n/a	37	19	0.513514	17.9076
			280	79.5775	-4.793	800.4	34.8814	0.0493	28.0079	1.13469e+09	2.83113e+07	1.79528e+07	454822	2.0605e-09	6.06653e-11	AAW	FS - EGC core	n/a	n/a	47	27	0.574468	19.606
			285	78.8015	-4.9693	10.2	30.1167	-1.5673	24.2081	5.82795e+09	1.39915e+08	1.97059e+07	722742	2.69025e-09	1.06602e-10	PSW	FS - EGC core	12	2.85714	n/a	n/a	n/a	n/a
			285	78.8015	-4.9693	301.3	34.8567	0.7694	27.9454	1.57978e+09	3.82287e+07	2.33324e+07	1.11666e+06	2.63593e-09	1.32736e-10	AAW	FS - EGC core	n/a	n/a	29	10	0.344828	20.445
			285	78.8015	-4.9693	501.2	34.8705	0.3608	27.9815	1.2967e+09	3.15136e+07	1.89961e+07	615140	2.18367e-09	7.79302e-11	AAW	FS - EGC core	n/a	n/a	42	23	0.547619	18.71
			285	78.8015	-4.9693	801.4	34.8812	0.0524	28.0076	1.19117e+09	2.95118e+07	1.65384e+07	752323	1.94539e-09	9.31813e-11	AAW	FS - EGC core	n/a	n/a	53	36	0.679245	17.1427
